# Supplementary material for: Ion-incorporated titanium implants for staged regulation of antibacterial activity and immunoregulation-mediated osteogenesis
Source: Royal Society of Chemistry journal article supplement (doi:10.1039/d3nr05858a), 2024-01-01
Supplement: d3nr05858a1.pdf [file d3nr05858a1.pdf]

## Supporting Information

Bingfeng Wu <sup>a,#</sup>, Yufei Tang <sup>a,#</sup>, Keyi Yao <sup>b</sup>, Xin Luo <sup>b</sup>, Shuqi Feng <sup>a</sup>, Kai  
Wang <sup>b</sup>, Xuemei Zhou <sup>b,\*</sup>, Lin Xiang <sup>a,\*</sup>

a. State Key Laboratory of Oral Diseases & National Center for Stomatology &  
National Clinical Research Center for Oral Diseases, West China Hospital of  
Stomatology, Sichuan University, Chengdu 610041, Sichuan, China

b. School of Chemical Engineering, Sichuan University, Chengdu 610041, Sichuan,  
China.

# These authors contributed equally

\* Correspondence

Lin Xiang, State Key Laboratory of Oral Diseases & National Center for Stomatology  
& National Clinical Research Center for Oral Diseases, West China Hospital of  
Stomatology, Sichuan University, Chengdu 610041, Sichuan, China; Phone: +86 28  
85503579; E-mail: dentistxiang@126.com.

Xuemei Zhou, School of Chemical Engineering, Sichuan University, No 24th, South  
Section 1, Yihuan Road, Chengdu, 610065, China; E-mail: xuemeizhou@scu.edu.cn.

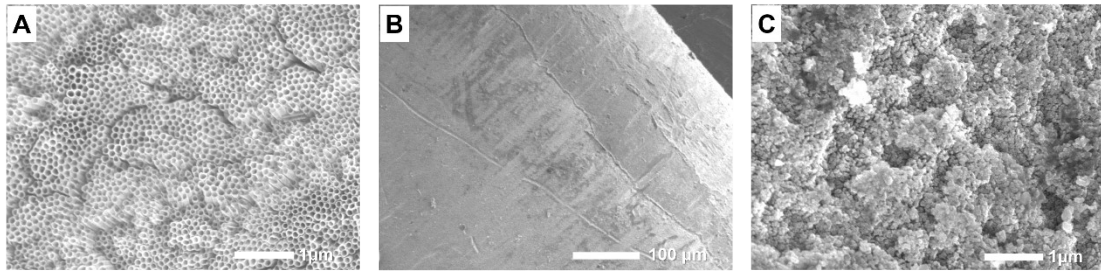

**Figure S1.** SEM images of titanium rods used as implants: (A) TiO<sub>2</sub> rod, (B-C) Zn-Sr/TiO<sub>2</sub> rod.

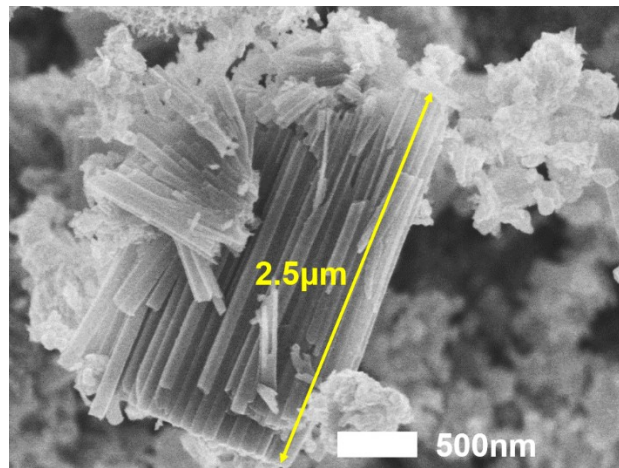

**Figure S2.** SEM images of cross sectional TiO<sub>2</sub> nanotubes on a flat Ti support.

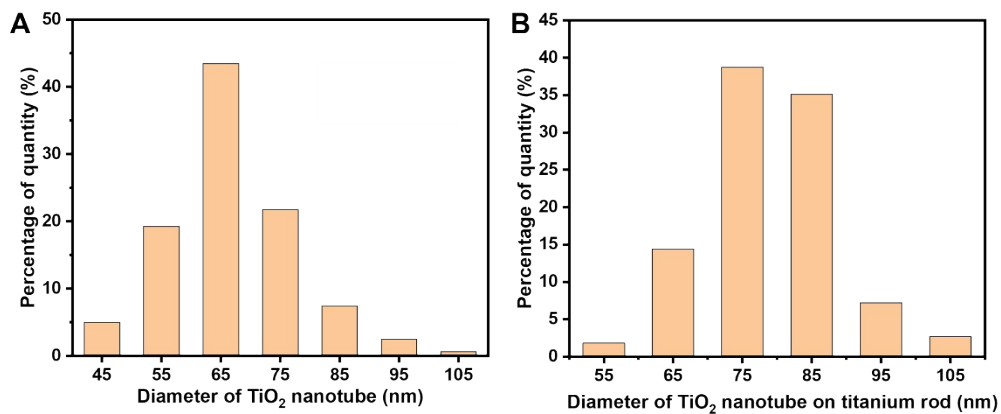

**Figure S3.** Analysis on the top diameter of TiO<sub>2</sub> nanotube (A) on titanium foil (Average size: 68.7±10.8 nm) and (B) on titanium rod (Average size: 74.2±9.7 nm).

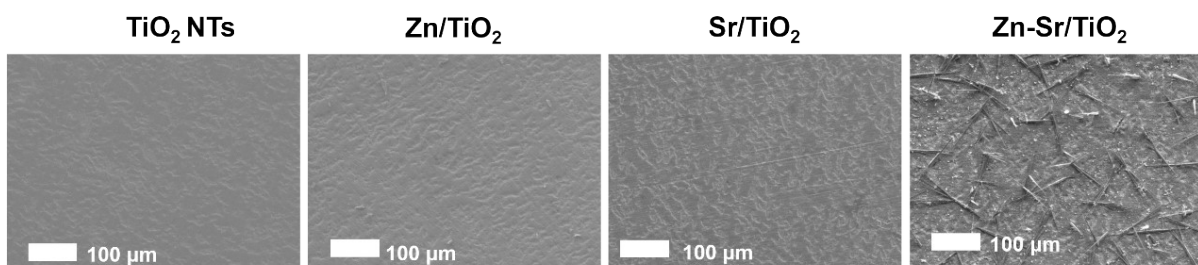

**Figure S4.** SEM images of different investigated surfaces.

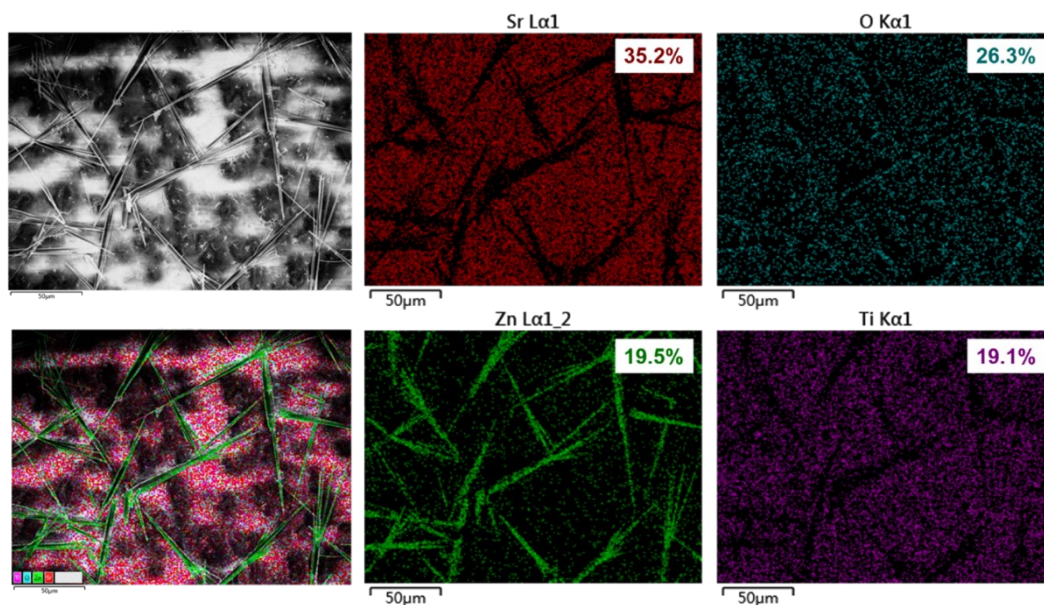

**Figure S5.** EDS analysis of surface regions contains needles on Zn-Sr/TiO<sub>2</sub> surface.

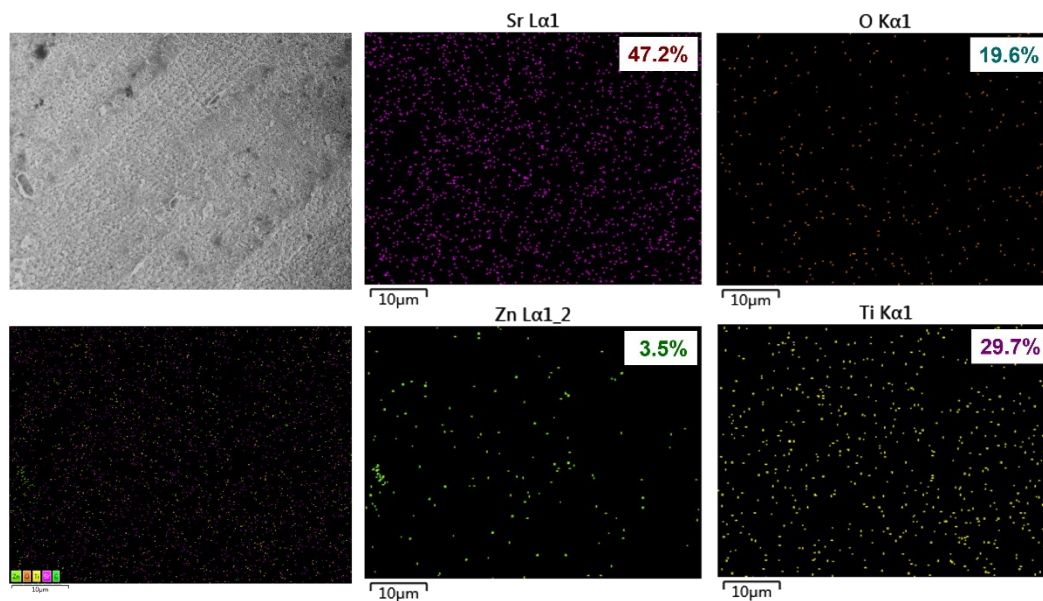

**Figure S6.** EDS analysis of Zn-Sr/TiO<sub>2</sub> rod.

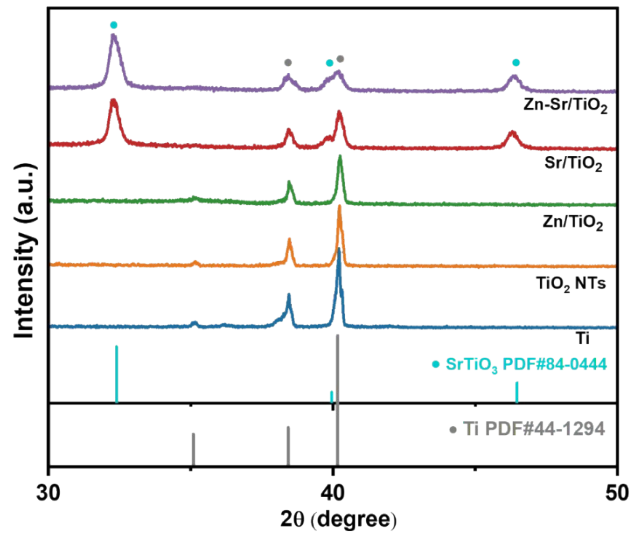

**Figure S7.** XRD patterns of TiO<sub>2</sub> NTs, Zn/TiO<sub>2</sub>, Sr/TiO<sub>2</sub> and Zn-Sr/TiO<sub>2</sub>.

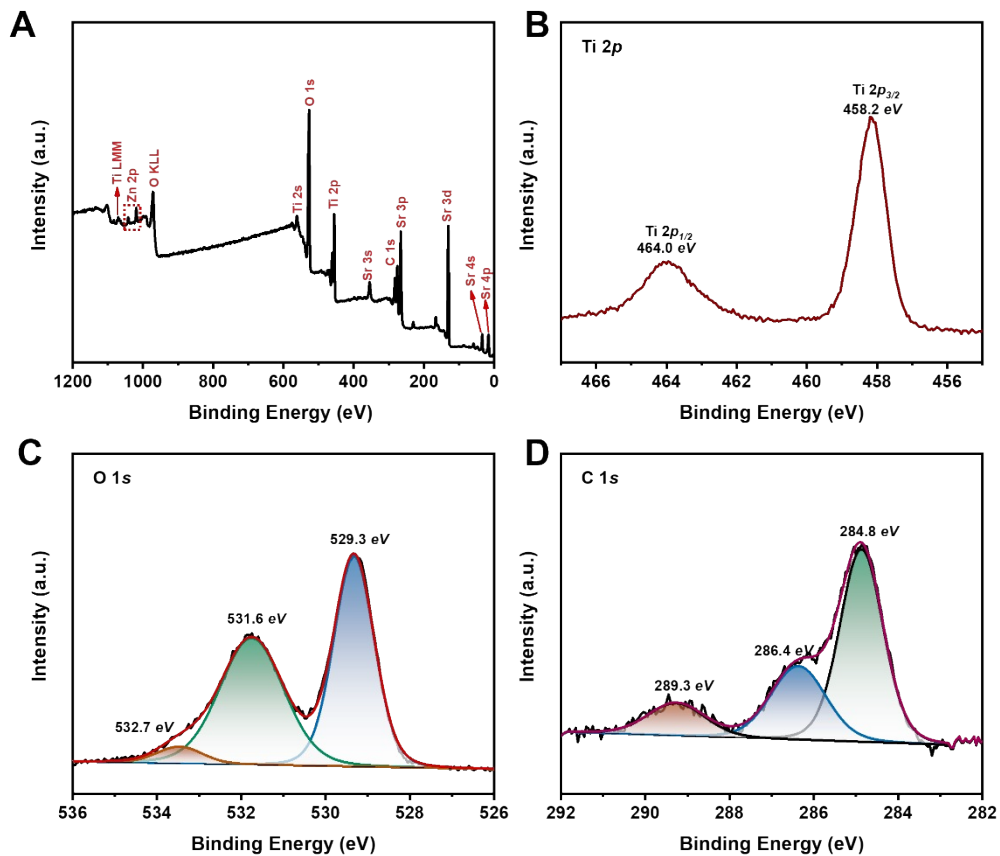

**Figure S8.** (A) XPS survey spectrum of Zn-Sr/TiO<sub>2</sub> and corresponding high resolution XPS spectra: (B) Ti 2*p*, (c) O 1*s*, (d) C 1*s*.

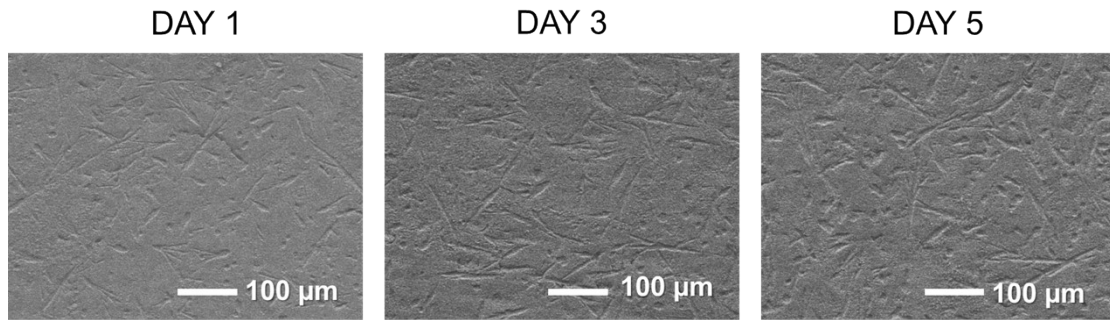

**Figure S9.** SEM images of Zn-Sr/TiO<sub>2</sub> during ion release process in SBF solution.

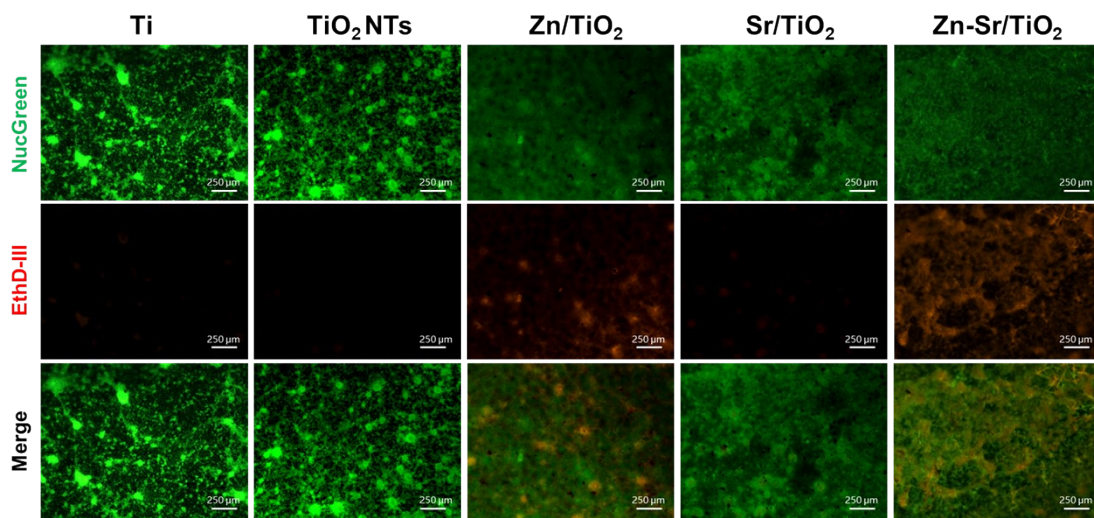

**Figure S10.** Live/Dead bacterial staining images of *S. aureus* cocultured from different group.

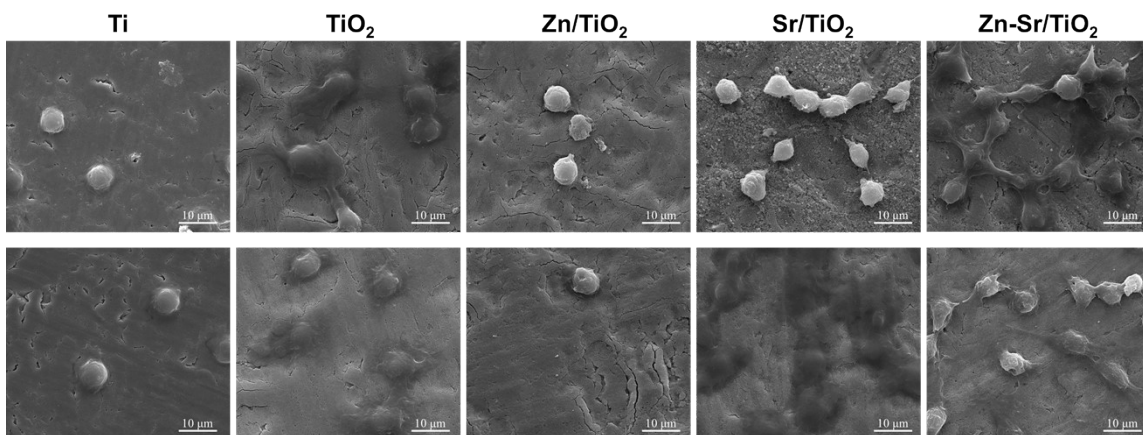

**Figure S11.** SEM images of RAW 264.7 cells culturing on different specimens at low magnification.

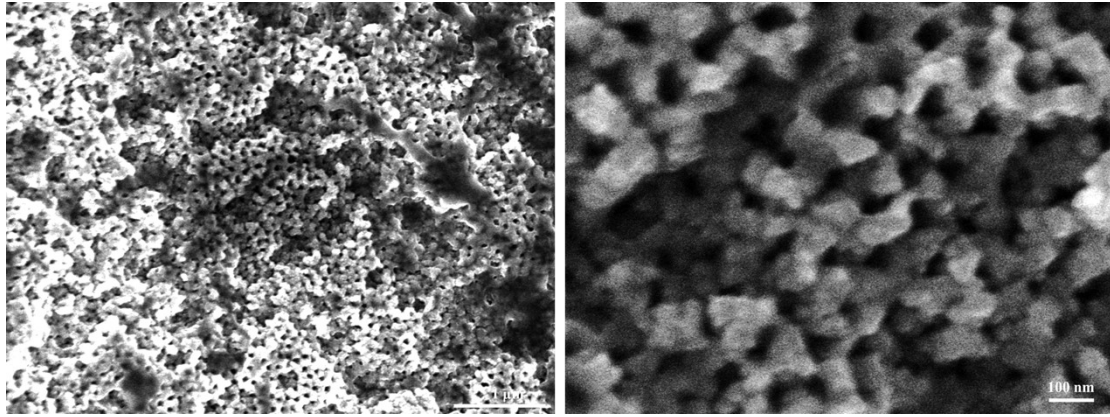

**Figure S12.** SEM images of Zn-Sr/TiO<sub>2</sub> rod taken from femur 3 days post-surgery.

**Table S1** Primer sequences of the genes involved in this study.

| Primer        | Forward primer 5'-3'    | Reverse primer 5'-3'     |
|---------------|-------------------------|--------------------------|
| GADPH         | AAGGCCGGGGCCCACTTGAA    | GGACTGTGGTCATGAGCCCTTCCA |
| iNOS          | GTTCTCAGCCCAACAATACAAGA | GTGGACGGGTCGATGTCAC      |
| TNF- $\alpha$ | CAGGCGGTGCCTATGTCTC     | CGATCACCCCGAAGTTCAGTAG   |
| TGF- $\beta$  | GAGCCCGAAGCGGACTACTA    | TGGTTTTCTCATAGATGGCGTTG  |
